# Supplementary material for: A highly active and robust iron quinquepyridine complex for photocatalytic CO2 reduction in aqueous acetonitrile solution
Source: Royal Society of Chemistry journal article supplement (doi:10.1039/d0cc01930e), 2020-01-01
Supplement: d0cc01930e1.pdf [file d0cc01930e1.pdf]

## Electronic Supplementary Information (ESI)

# Highly active and robust iron quinquepyridine complex for photocatalytic CO<sub>2</sub> reduction in aqueous acetonitrile solution

Yanfei Qin,<sup>‡[a, b]</sup> Lingjing Chen,<sup>‡[b]</sup> Gui Chen,<sup>\*[b]</sup> Zhenguo Guo,<sup>[c]</sup> Lei Wang,<sup>[a]</sup> Hongbo Fan,<sup>[b]</sup> Marc Robert<sup>\*[d,e]</sup> and Tai-Chu Lau<sup>\*[c]</sup>

<sup>a</sup> Shenzhen Key Laboratory of Polymer Science and Technology College of Materials Science and Engineering, Shenzhen University Xueyuan Avenue 1066, Nanshan, Shenzhen, 518055, China.

<sup>b</sup> School of Environment and Civil Engineering, Dongguan Cleaner Production Technology Center, Dongguan University of Technology, Guangdong 523808, P. R. China.

Email: [chengui@dgut.edu.cn](mailto:chengui@dgut.edu.cn)

<sup>c</sup> Department of Chemistry, City University of Hong Kong, Tat Chee Avenue, Hong Kong, China.

Email: [bhtclau@cityu.edu.hk](mailto:bhtclau@cityu.edu.hk)

<sup>d</sup> Université de Paris, Laboratoire d'Electrochimie Moléculaire, CNRS, F-75013 Paris, France.

<sup>e</sup> Institut Universitaire de France (IUF), F-75005 Paris, France.

Email: [robert@u-paris.fr](mailto:robert@u-paris.fr)

## Contents

|                                                                                                                                                                                                                                                                     |           |
|---------------------------------------------------------------------------------------------------------------------------------------------------------------------------------------------------------------------------------------------------------------------|-----------|
| <b>1. Structures of [Fe(dqtpy)(H<sub>2</sub>O)<sub>2</sub>]<sup>2+</sup>, [Fe(qpy)(H<sub>2</sub>O)<sub>2</sub>]<sup>2+</sup>, [Fe(tpy)<sub>2</sub>]<sup>2+</sup>, [Fe(bpy)<sub>2</sub>Cl<sub>2</sub>]<sup>+</sup> and [Fe(phen)<sub>3</sub>]<sup>2+</sup> .....</b> | <b>4</b>  |
| <b>2. Experimental details .....</b>                                                                                                                                                                                                                                | <b>4</b>  |
| Chemicals .....                                                                                                                                                                                                                                                     | 4         |
| Synthesis of [Fe(qnpy)(H <sub>2</sub> O) <sub>2</sub> ](ClO <sub>4</sub> ) <sub>2</sub> .....                                                                                                                                                                       | 4         |
| Characterization .....                                                                                                                                                                                                                                              | 5         |
| Photocatalytic CO <sub>2</sub> reduction .....                                                                                                                                                                                                                      | 5         |
| Electrochemical studies .....                                                                                                                                                                                                                                       | 5         |
| Quantum yield determination .....                                                                                                                                                                                                                                   | 6         |
| Fluorescence quenching .....                                                                                                                                                                                                                                        | 6         |
| Dynamic light scattering .....                                                                                                                                                                                                                                      | 6         |
| <b>2. Additional data .....</b>                                                                                                                                                                                                                                     | <b>7</b>  |
| <b>References .....</b>                                                                                                                                                                                                                                             | <b>13</b> |

|                                                                                                                                                                                                                                                                                                      |   |
|------------------------------------------------------------------------------------------------------------------------------------------------------------------------------------------------------------------------------------------------------------------------------------------------------|---|
| <b>Scheme S1</b> Structures of [Fe(dqtpy)(H <sub>2</sub> O) <sub>2</sub> ] <sup>2+</sup> , [Fe(qpy)(H <sub>2</sub> O) <sub>2</sub> ] <sup>2+</sup> , [Fe(tpy) <sub>2</sub> ] <sup>2+</sup> , [Fe(bpy) <sub>2</sub> Cl <sub>2</sub> ] <sup>+</sup> , and [Fe(phen) <sub>3</sub> ] <sup>2+</sup> ..... | 4 |
|------------------------------------------------------------------------------------------------------------------------------------------------------------------------------------------------------------------------------------------------------------------------------------------------------|---|

|                                                                                                                                                                                                                                                                                                                                                                                                                                                   |   |
|---------------------------------------------------------------------------------------------------------------------------------------------------------------------------------------------------------------------------------------------------------------------------------------------------------------------------------------------------------------------------------------------------------------------------------------------------|---|
| <b>Fig. S1</b> MS analysis of CO evolved in the headspace of sample flask under CO <sub>2</sub> (left) or <sup>13</sup> CO <sub>2</sub> (right). Sample solution: 0.05 mM <b>1</b> , 0.2 mM Ru(phen) <sub>3</sub> <sup>2+</sup> and 0.11 M BIH in MeCN/H <sub>2</sub> O (1:1, v/v) solution. Isotopic labeling experiments indicate the peak at m/z 29, assigned to <sup>13</sup> CO, is produced under 1 atm <sup>13</sup> CO <sub>2</sub> ..... | 7 |
|---------------------------------------------------------------------------------------------------------------------------------------------------------------------------------------------------------------------------------------------------------------------------------------------------------------------------------------------------------------------------------------------------------------------------------------------------|---|

|                                                                                                                                                                                                                                                                                                               |   |
|---------------------------------------------------------------------------------------------------------------------------------------------------------------------------------------------------------------------------------------------------------------------------------------------------------------|---|
| <b>Fig. S2</b> Particle size distribution of a CO <sub>2</sub> -saturated MeCN/H <sub>2</sub> O (1:1, v/v) solution containing 0.05 mM <b>1</b> , 0.2 mM Ru(phen) <sub>3</sub> <sup>2+</sup> and 0.11 M BIH determined by dynamic light scattering (DLS) measurements during irradiation from 0 to 68 h. .... | 7 |
|---------------------------------------------------------------------------------------------------------------------------------------------------------------------------------------------------------------------------------------------------------------------------------------------------------------|---|

|                                                                                                                                                                                                                                                                                                                                                        |  |
|--------------------------------------------------------------------------------------------------------------------------------------------------------------------------------------------------------------------------------------------------------------------------------------------------------------------------------------------------------|--|
| <b>Fig. S3</b> CO and H <sub>2</sub> production upon visible-light irradiation (blue LED centered at 460 nm) of a CO <sub>2</sub> -saturated MeCN/H <sub>2</sub> O (1:1, v/v) solution (2 mL) containing 0.05 mM <b>1</b> , 0.2 mM Ru(phen) <sub>3</sub> <sup>2+</sup> and 0.11 M BIH without Hg(0) (red) and in the presence of 0.2 mL Hg(0) (black). |  |
|--------------------------------------------------------------------------------------------------------------------------------------------------------------------------------------------------------------------------------------------------------------------------------------------------------------------------------------------------------|--|

The TON for CO slightly decreased from 2190 to 1918 when Hg(0) is added. The errors are around 10%. .....8

**Fig. S4** Stability tests of the photosystem during light irradiation. Plot of CO versus time for the first cycle (■) and second cycle with re-bubbling of CO<sub>2</sub> and the addition of another equiv. of **1** (●), Ru(phen)<sub>3</sub><sup>2+</sup> (▲), BIH (▼) or Ru(phen)<sub>3</sub><sup>2+</sup> +BIH (◆). The solution contains initially 0.05 mM **1**, 0.2 mM Ru(phen)<sub>3</sub><sup>2+</sup> and 0.11 M BIH in 2 mL MeCN/H<sub>2</sub>O (1:1, v/v). The errors are around 10%. .....8

**Fig. S5** Stern-Volmer plot for luminescence lifetime quenching of excited Ru(phen)<sub>3</sub><sup>2+</sup> (0.05 mM) by catalyst **1** in MeCN/H<sub>2</sub>O (1:1, v/v) solution. ....9

**Table S1** Photocatalytic reduction of CO<sub>2</sub> with **1**.<sup>a</sup> .....10

**Table S2** Comparison of the photocatalytic performances for CO<sub>2</sub> reduction with molecular catalysts based on earth-abundant metal complexes. ....11

**1. Structures of  $[\text{Fe}(\text{dqtpy})(\text{H}_2\text{O})_2]^{2+}$ ,  $[\text{Fe}(\text{qpy})(\text{H}_2\text{O})_2]^{2+}$ ,  $[\text{Fe}(\text{tpy})_2]^{2+}$ ,  $[\text{Fe}(\text{bpy})_2\text{Cl}_2]^+$  and  $[\text{Fe}(\text{phen})_3]^{2+}$**

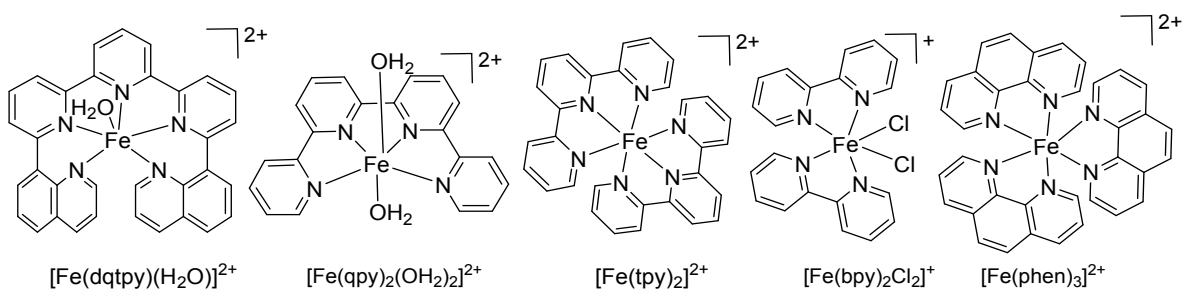

**Scheme S1** Structures of  $[\text{Fe}(\text{dqtpy})(\text{H}_2\text{O})_2]^{2+}$ ,  $[\text{Fe}(\text{qpy})(\text{H}_2\text{O})_2]^{2+}$ ,  $[\text{Fe}(\text{tpy})_2]^{2+}$ ,  $[\text{Fe}(\text{bpy})_2\text{Cl}_2]^+$ , and  $[\text{Fe}(\text{phen})_3]^{2+}$ .

**2. Experimental details**

**Chemicals**

Iron(II) perchlorate hydrate (Sigma-Aldrich, 98%), sodium formate (Sigma-Aldrich, 99.998%), acetonitrile (Sigma-Aldrich, 99.9%), N,N-Dimethylformamide (DMF, Sigma-Aldrich, 99.9%), 2-phenylbenzimidazole (J&K, 98%), iodomethane (Energy Chemical, 99.5%) and sodium borohydride (Acros, 99%) were used as received.  $\text{Ru}(\text{phen})_3\text{Cl}_2$  (phen = 1,10-phenanthroline),<sup>[1]</sup>  $[\text{Fe}(\text{dqtpy})(\text{H}_2\text{O})](\text{ClO}_4)_2$  (dqtpy = 6,6''-di(quinolin-8-yl)-2,2':6',2''-terpyridine),<sup>[2]</sup>  $[\text{Fe}(\text{qpy})(\text{H}_2\text{O})_2](\text{ClO}_4)_2$  (qpy = 2,2' :6' ,2'' :6'' ,2' ' ' -quaterpyridine),<sup>[3]</sup>  $[\text{Fe}(\text{tpy})_2](\text{ClO}_4)_2$  (tpy = 2,2' :6' ,2''-terpyridine),<sup>[4]</sup>  $[\text{Fe}(\text{bpy})_2\text{Cl}_2]\text{Cl}$  (bpy = 2,2'-bipyridine),<sup>[5]</sup>  $[\text{Fe}(\text{phen})_3]\text{Cl}_2$ ,<sup>[6]</sup> qnpy (2,2':6',2'':6'',2''':6''',2''''-quinquepyridine)<sup>[7]</sup> and BIH (1,3-dimethyl-2-phenyl-2,3-dihydro-1H-benzo[d]imidazole)<sup>[8]</sup> were synthesized according to literature methods.

**Synthesis of  $[\text{Fe}(\text{qnpy})(\text{H}_2\text{O})_2](\text{ClO}_4)_2$**

The iron(II) complex was prepared by reacting the 2,2':6',2'':6'',2''':6''',2''''-quinquepyridine (100 mg, 0.26 mmol) and iron(II) perchlorate hexahydrate (1.2 equivalents, 113 mg) in acetonitrile (20 mL) at room temperature for 12 h under argon. The crude products were recrystallized by diffusion of diethyl ether to  $\text{CH}_3\text{CN}$  solution.  $[\text{Fe}(\text{qnpy})(\text{H}_2\text{O})_2](\text{ClO}_4)_2$  was obtained as red solid (58 mg, 35% yield).<sup>[9]</sup> ESI-MS (MeOH):  $m/z = 222.0$  for  $[\text{Fe}(\text{qnpy})]^{2+}$  and 542.4 for  $\{[\text{Fe}(\text{qnpy})](\text{ClO}_4)\}^+$ ; Anal. Calcd. (Found) for  $\text{C}_{25}\text{H}_{21}\text{Cl}_2\text{N}_5\text{FeO}_{10}$ : C, 44.27 (43.77), H, 3.12 (2.98), N, 10.33 (10.11).

## Characterization

Electrospray ionization mass spectrometry (ESI/MS) was conducted on a PE SCIEX API 150 mass spectrometer. The analytic solution was continuously infused with a syringe pump at a constant flow rate into the pneumatically assisted electrospray probe with nitrogen as the nebulizing gas.  $^1\text{H}$ NMR spectra were recorded on Bruker 400 MHz spectrometer and the chemical shift is expressed in ppm. Elemental analyses were done on an Elementar Vario EL analyzer.

## Photocatalytic $\text{CO}_2$ reduction

In a typical run, a 2 mL MeCN/ $\text{H}_2\text{O}$  (1:1, v/v) solution containing 0.05 mM **1**, 0.2 mM  $\text{Ru}(\text{phen})_3^{2+}$  and 0.11 M BIH (50 mg) was put in a glass tube and then sealed with a rubber septum. The solution was bubbled with  $\text{CO}_2$  for 30 min and then irradiated with visible light (blue LED centered at 460nm) for 68 h at 293 K in a thermostatted water bath. The inner volume of the tube is about 12.3 mL. 100  $\mu\text{L}$  aliquots of gaseous products in the headspace were analyzed by gas chromatography-thermal conductivity detector (GC-TCD, Agilent 7820A) fitted with a Molsieve 5Å PLOT column (CP7534, 30 m  $\varnothing$  0.32 mm  $\varnothing$  10  $\mu\text{m}$ ). No alkane, alkene or alkyne was detected. The calibration curves were obtained by filling pure  $\text{H}_2$  and  $\text{CO}$  gas to a tube with a graduated gastight syringe. GC-MS (Agilent 6890-5975 with DB-5MS column, 30 m  $\varnothing$  0.25 mm  $\varnothing$  0.25  $\mu\text{m}$ ). Ion chromatography DX-600 (Dionex, IonPac AS19 (0.4  $\times$  250 mm) + AG19 Column (4  $\times$  50 mm)) were used to analyze the liquid reaction products in the solution. The experiments were performed at least in duplicate.  $^{13}\text{C}$ -labeling experiments were conducted following the same procedure except  $^{13}\text{CO}_2$  was used and the gaseous products were analyzed by Agilent 7820A GC-TCD and Agilent 6890GC -5975MS.

## Electrochemical studies

Cyclic voltammetry was performed with a CHI 660E instrument. The three-electrode set-up consists of a glassy carbon working electrode (CHI 104, 0.071  $\text{cm}^2$ ), a Pt wire counter electrode (CHI 115) and a saturated calomel reference electrode (SCE, CHI 150). Working electrode was polished with  $\alpha\text{-Al}_2\text{O}_3$  (successively 0.3, 0.1, and 0.05  $\mu\text{m}$ , 1 min each), thoroughly rinsed and with  $\text{H}_2\text{O}$  and ethanol. The solution was purged with argon or  $\text{CO}_2$ . All reported potentials in this study are versus SCE at a scan rate of 0.1  $\text{V}\cdot\text{s}^{-1}$ .

### Quantum yield determination

Blue LED light strip (1 modules, centered at 460 nm) was used for evaluating the number of photons. The average light intensity taken before and after photochemical reaction was  $6 \times 10^{-9}$  einstein  $s^{-1}$ . Typically for the photochemical reaction, a quartz cell (light path length = 1 cm) containing 0.05 mM **1**, 0.2 mM Ru(phen) $_3^{2+}$  and 0.11 M BIH in a 2 mL CO $_2$ -saturated MeCN/H $_2$ O (1:1, v/v) was irradiated with blue LED light. The solution was vigorously stirred during the irradiation. The amount of CO after irradiation for 24 h was determined by GC-TCD. The quantum yield for CO $_2$  reduction to CO was calculated using the following equation:

$$\phi_{CO} = \frac{\text{number of CO molecules}}{\text{number of incident photons}} \times 100\%$$

### Fluorescence quenching

The excited-state lifetime ( $\tau_0$ ) of Ru(phen) $_3^{2+*}$  was measured with a FLS 980 fluorescence spectrometer (Edinburgh instruments). The quenching experiments were performed by addition of various amounts of BIH or catalyst **1** to an anaerobic 2 mL CO $_2$ -saturated MeCN/H $_2$ O (1:1, v/v) solution of Ru(phen) $_3^{2+}$  (0.05 mM). The relative emission lifetime of the characteristic emission of Ru(phen) $_3^{2+*}$  at 700 nm in the presence of different concentrations of BIH or catalyst **1** was used to calculate the quenching rate constant ( $k_q$ ) according to the Stern-Volmer equation.

$$\tau_0/\tau = 1 + k_q \tau_0 [Q]$$

Where  $I_0$  and  $I$  are the emission intensity in the absence and presence of quencher,  $\tau_0$  and  $\tau$  are the excited state lifetime in the absence and presence of quencher,  $k_q$  is the bimolecular quenching rate constant, and  $[Q]$  is the molar concentration of the quencher.

### Dynamic light scattering

Dynamic light scattering (DLS) measurements were performed by using a Zetasizer Nano ZS instrument (Malvern Instruments Ltd., USA), which can detect particle sizes ranging from 0.6–6000 nm. The light source was a HeNe gas laser (4 mW,  $\lambda = 632.8$  nm). Data were obtained by using a scattering angle of 175° at 23 °C.

## 2. Additional data

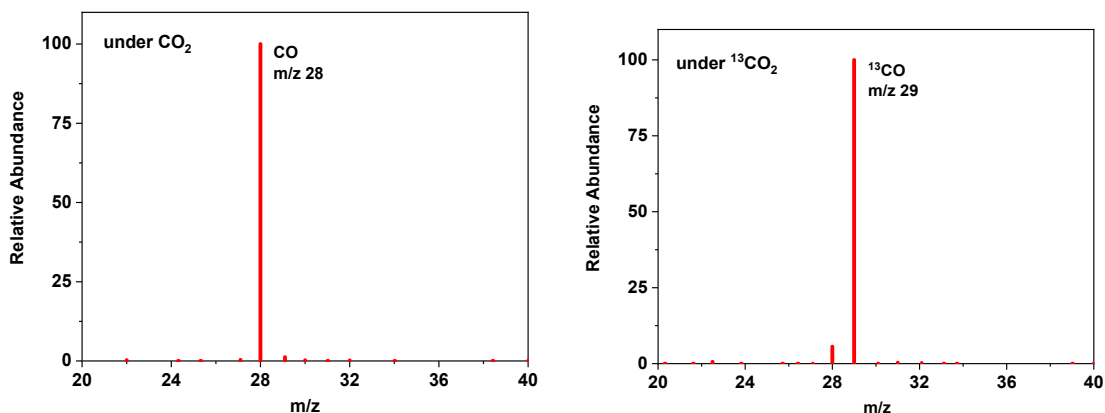

**Fig. S1** MS analysis of CO evolved in the headspace of sample flask under CO<sub>2</sub> (left) or <sup>13</sup>CO<sub>2</sub> (right). Sample solution: 0.05 mM **1**, 0.2 mM Ru(phen)<sub>3</sub><sup>2+</sup> and 0.11 M BIH in MeCN/H<sub>2</sub>O (1:1, v/v) solution. Isotopic labeling experiments indicate the peak at m/z 29, assigned to <sup>13</sup>CO, is produced under 1 atm <sup>13</sup>CO<sub>2</sub>.

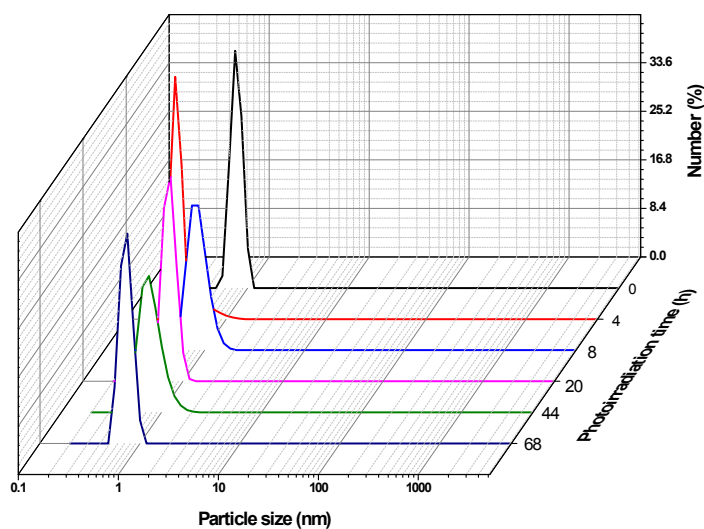

**Fig. S2** Particle size distribution of a CO<sub>2</sub>-saturated MeCN/H<sub>2</sub>O (1:1, v/v) solution containing 0.05 mM **1**, 0.2 mM Ru(phen)<sub>3</sub><sup>2+</sup> and 0.11 M BIH determined by dynamic light scattering (DLS) measurements during irradiation from 0 to 68 h.

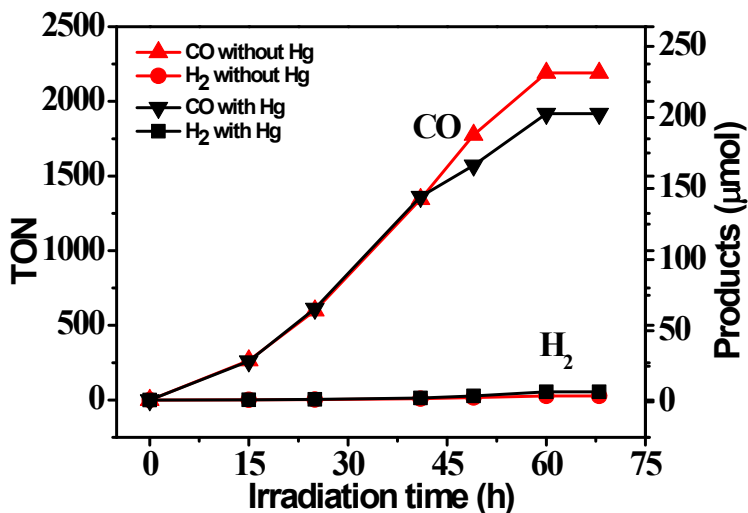

**Fig. S3** CO and H<sub>2</sub> production upon visible-light irradiation (blue LED centered at 460 nm) of a CO<sub>2</sub>-saturated MeCN/H<sub>2</sub>O (1:1, v/v) solution (2 mL) containing 0.05 mM **1**, 0.2 mM Ru(phen)<sub>3</sub><sup>2+</sup> and 0.11 M BIH without Hg(0) (red) and in the presence of 0.2 mL Hg(0) (black). The TON for CO slightly decreased from 2190 to 1918 when Hg(0) is added. The errors are around 10%.

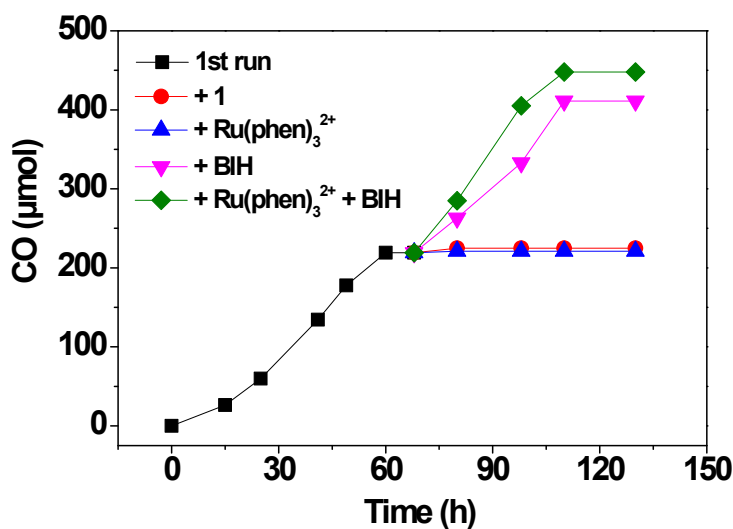

**Fig. S4** Stability tests of the photosystem during light irradiation. Plot of CO versus time for the first cycle (■) and second cycle with re-bubbling of CO<sub>2</sub> and the addition of another equiv. of **1** (●), Ru(phen)<sub>3</sub><sup>2+</sup> (▲), BIH (▼) or Ru(phen)<sub>3</sub><sup>2+</sup> + BIH (◆). The solution contains initially 0.05 mM **1**, 0.2 mM Ru(phen)<sub>3</sub><sup>2+</sup> and 0.11 M BIH in 2 mL MeCN/H<sub>2</sub>O (1:1, v/v). The errors are around 10%.



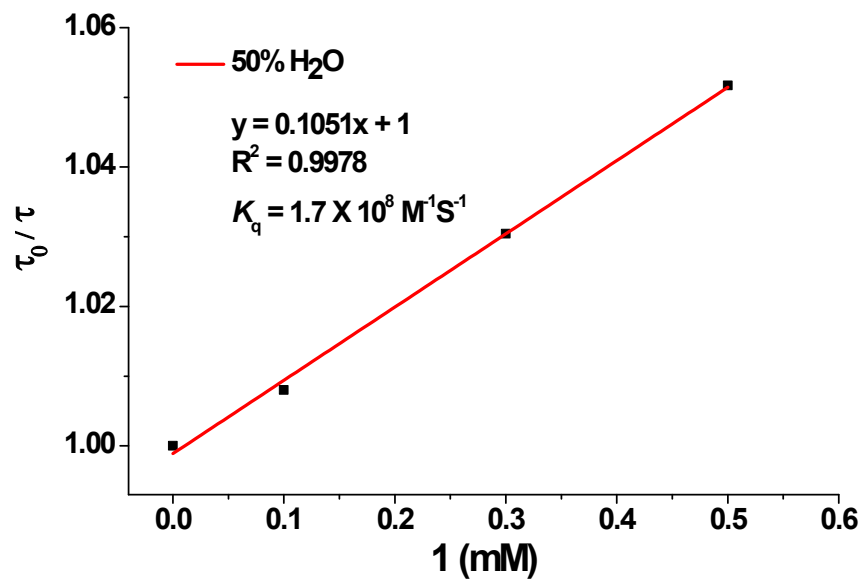

**Fig. S5** Stern-Volmer plot for luminescence lifetime quenching of excited Ru(phen)<sub>3</sub><sup>2+</sup> (0.05 mM) by catalyst **1** in MeCN/H<sub>2</sub>O (1:1, v/v) solution.

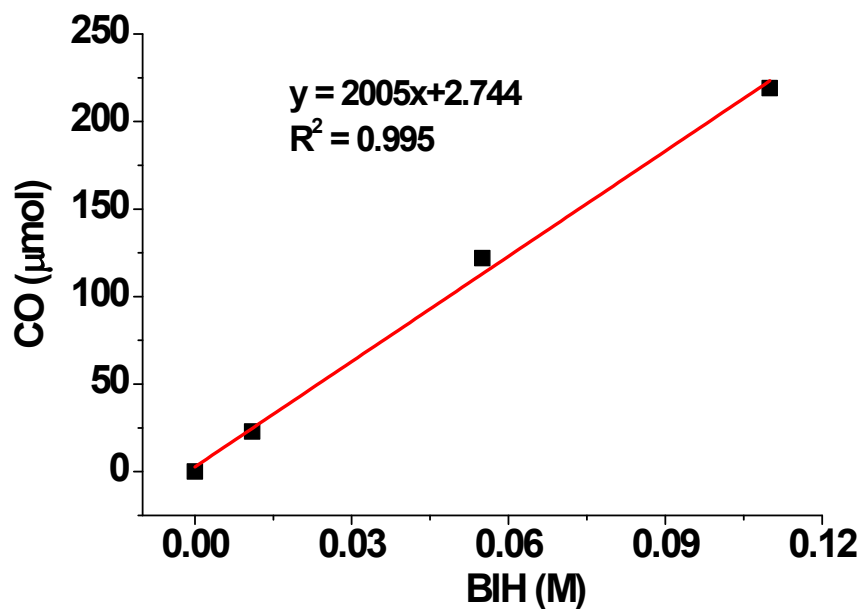

**Fig. S6** Plot of amount of CO ( $\mu\text{mol}$ ) vs. [BIH] in a CO<sub>2</sub>-saturated MeCN/H<sub>2</sub>O (1:1, v/v) solution containing 0.05 mM **1** and 0.2 mM Ru(phen)<sub>3</sub><sup>2+</sup>.

**Table S1** Photocatalytic reduction of CO<sub>2</sub> with **1**.<sup>a</sup>

| Entry          | <b>1</b><br>mM | Ru(phen) <sub>3</sub> <sup>2+</sup><br>mM | Sacrificial<br>reductant | Proton<br>source     | TON(selectivity %) |                |       |
|----------------|----------------|-------------------------------------------|--------------------------|----------------------|--------------------|----------------|-------|
|                |                |                                           |                          |                      | CO                 | H <sub>2</sub> | HCOOH |
| 1 <sup>b</sup> | 0.05           | 0.2                                       | 0.11 M BIH+20% TEOA      | -                    | 208(94)            | 14(6)          | 0(0)  |
| 2              | 0.05           | 0.2                                       | 0.11 M BIH               | 20% H <sub>2</sub> O | 1751(97)           | 32(2)          | 18(1) |
| 3              | 0.05           | 0.2                                       | 0 M BIH                  | 50% H <sub>2</sub> O | 0(0)               | 0(0)           | 0(0)  |
| 4              | 0.05           | 0.2                                       | 0.011 M BIH              | 50% H <sub>2</sub> O | 229(100)           | 0(0)           | 0(0)  |
| 5              | 0.05           | 0.2                                       | 0.055 M BIH              | 50% H <sub>2</sub> O | 1219(99)           | 9(1)           | 0(0)  |
| 6              | 0.05           | 0.2                                       | 0.11 M BIH               | 50% H <sub>2</sub> O | 2190(99)           | 27(1)          | 0(0)  |
| 7              | 0.05           | 0.01                                      | 0.11 M BIH               | 50% H <sub>2</sub> O | 1793(99)           | 18(1)          | 0(0)  |
| 8              | 0.05           | 0.05                                      | 0.11 M BIH               | 50% H <sub>2</sub> O | 2130(99)           | 26(1)          | 0(0)  |
| 9              | 0.02           | 0.5                                       | 0.11 M BIH               | 50% H <sub>2</sub> O | 2008(99)           | 22(1)          | 0(0)  |

<sup>a</sup> In a typical run, a CO<sub>2</sub>-saturated MeCN/H<sub>2</sub>O (1:1, v/v) containing **1** (0.05 mM), Ru(phen)<sub>3</sub><sup>2+</sup> (0.2 mM) and BIH (0.11 M) irradiated for 68 h. The errors are around 10%.

**Table S2** Comparison of the photocatalytic performances for CO<sub>2</sub> reduction with molecular catalysts based on earth-abundant metal complexes.

| Catalyst                                                                  | Photosensitizer                        | [Catalyst]/<br>[Photosensitizer] | TON(selectivity %) based on catalyst |                |                                 | $\Phi_{CO}$ | Reaction conditions                                                                         | Reference                                                                        |
|---------------------------------------------------------------------------|----------------------------------------|----------------------------------|--------------------------------------|----------------|---------------------------------|-------------|---------------------------------------------------------------------------------------------|----------------------------------------------------------------------------------|
|                                                                           |                                        |                                  | CO                                   | H <sub>2</sub> | HCOOH                           |             |                                                                                             |                                                                                  |
| [Fe(qnpy)(H <sub>2</sub> O) <sub>2</sub> ] <sup>2+</sup>                  | [Ru(phen) <sub>3</sub> ] <sup>2+</sup> | 0.05 mM / 0.2 mM                 | 2190(99)                             | 27(1)          | 0(0)                            | 0.8%        | 0.11 M BIH and 50% H <sub>2</sub> O in MeCN, blue LED (centered at 460 nm), 68 h            | <i>This work</i>                                                                 |
|                                                                           |                                        | 5 $\mu$ M / 0.2 mM               | 14095(98)                            | 360(2)         | 0(0)                            | -           |                                                                                             |                                                                                  |
| [Fe(phen) <sub>2</sub> (C <sub>2</sub> H <sub>5</sub> OH)Cl] <sup>+</sup> | [Ru(bpy) <sub>3</sub> ] <sup>2+</sup>  | 0.03 mM / 0.67 mM                | 2567(85.4)                           | 171(14.6)      | 0(0)                            | -           | 0.022 M BIH in 4 mL DMF/TEOA solution (v/v, 7:1), white LEDs ( $\lambda \geq 420$ nm), 2 h. | <i>Molecules</i> <b>2019</b> , <i>24</i> , 1-12. <sup>[6]</sup>                  |
|                                                                           |                                        | 0.15 $\mu$ M / 0.67 mM           | 33167(95.3)                          | 1650(4.7)      | 0(0)                            | -           |                                                                                             |                                                                                  |
| [Fe(phen) <sub>3</sub> ] <sup>2+</sup>                                    | [Ru(bpy) <sub>3</sub> ] <sup>2+</sup>  | 0.03 $\mu$ M / 0.67 mM           | 35417(68)                            | 16667(32)      | 0(0)                            | -           |                                                                                             |                                                                                  |
|                                                                           |                                        | 3 $\mu$ M / 0.67 mM              | 1642(90.3)                           | 176(9.7)       | 0(0)                            | -           |                                                                                             |                                                                                  |
| [Fe(dqtpy)(H <sub>2</sub> O)] <sup>2+</sup>                               | Purpurin                               | 0.05 mM / 0.05 mM                | 544(99.3)                            | 4(0.7)         | 0(0)                            | 0.12%       | 0.1 M BIH and 5% TFE in DMF, blue LED (460 nm), 15 h                                        | <i>Dalton Trans.</i> <b>2019</b> , <i>48</i> , 9596-9602. <sup>[2]</sup>         |
| [Fe(qpy)(OH <sub>2</sub> ) <sub>2</sub> ] <sup>2+</sup>                   | [Ru(bpy) <sub>3</sub> ] <sup>2+</sup>  | 0.05 mM / 0.2 mM                 | 1879(97)                             | 15(1)          | 48(2)                           | 8.8%        | 0.1 M BIH in MeCN/TEOA (4:1 v/v), blue LED (centered at 460 nm), 3 h                        | <i>J. Am. Chem. Soc.</i> <b>2016</b> , <i>138</i> , 9413-9416. <sup>[10]</sup>   |
|                                                                           |                                        | 0.005 mM / 0.2 mM                | 3844(85)                             | 534(12)        | 118(3)                          | -           |                                                                                             |                                                                                  |
|                                                                           | Purpurin                               | 0.05 mM / 0.02 mM                | 520(97)                              | 0(0)           | 14(3)                           | 1.1%        | 0.1 M BIH in DMF, blue LED (460 nm), 11 h                                                   |                                                                                  |
|                                                                           |                                        | 0.005 mM/0.02 mM                 | 1365(92)                             | 0(0)           | 115(8)                          | -           |                                                                                             |                                                                                  |
|                                                                           | mpg-C <sub>3</sub> N <sub>4</sub>      | 0.02 mM / 8.0 mg                 | 155(97)                              | <1             | 8(3)                            | 4.2%        | MeCN/TEOA (4:1, v/v), $\lambda \geq 400$ nm, 17 h                                           | <i>J. Am. Chem. Soc.</i> <b>2018</b> , <i>140</i> , 7437-7440. <sup>[11]</sup>   |
| Fe(0) porphyrin                                                           | Ir(ppy) <sub>3</sub>                   | 2 $\mu$ M / 0.2 mM               | 140(93)                              | 11(7)          | 0                               | 0.0013%     | 0.36 M TEA in MeCN, 150 W Xenon lamp ( $\lambda > 420$ nm), 55 h                            | <i>J. Am. Chem. Soc.</i> <b>2014</b> , <i>136</i> , 16768-16771. <sup>[12]</sup> |
| Fe- <i>p</i> -TMA                                                         | Ir(ppy) <sub>3</sub>                   | 2 $\mu$ M / 0.2 mM               | 367(78)                              | 26(5)          | 0(0) + (CH <sub>4</sub> 79(17)) | -           | 0.05M TEA in MeCN, 150 W Xenon lamp ( $\lambda > 420$ nm), 102 h                            | <i>Nature</i> <b>2017</b> , <i>548</i> , 74-77. <sup>[13]</sup>                  |
|                                                                           | Purpurin                               | 2 $\mu$ M / 0.2 mM               | 120(95)                              | 6(5)           | 0(0)                            | -           | 0.1 M NaHCO <sub>3</sub> , 0.05 M TEA, and 0.2 mM purpurin                                  | <i>ChemSusChem</i> <b>2017</b> , <i>10</i> , 4447-                               |

|                                                         |                                                                                                                   |                               |            |          |                                       |       |                                                                                                                                                                             |                                                                                           |
|---------------------------------------------------------|-------------------------------------------------------------------------------------------------------------------|-------------------------------|------------|----------|---------------------------------------|-------|-----------------------------------------------------------------------------------------------------------------------------------------------------------------------------|-------------------------------------------------------------------------------------------|
|                                                         |                                                                                                                   |                               |            |          |                                       |       | in MeCN/H <sub>2</sub> O (1:9 v/v), $\lambda > 420$ nm, 94 h                                                                                                                | 4450. <sup>[14]</sup>                                                                     |
|                                                         | Phen2                                                                                                             | 10 $\mu$ M / 1 mM             | 140(73)    | 23(12)   | 0(0)<br>+ (CH <sub>4</sub><br>29(15)) | -     | 0.1 M TEA and 0.1 M TFE in DMF, visible Light ( $\lambda > 435$ nm), 102 h                                                                                                  | <i>J. Am. Chem. Soc.</i> <b>2018</b> , <i>140</i> , 17830-17834. <sup>[15]</sup>          |
| Fe(dmp) <sub>2</sub> (NCS) <sub>2</sub>                 | Cu(dmp)(P) <sub>2</sub> <sup>+</sup>                                                                              | 0.05 mM / 0.25 mM             | 273(78)    | 75(22)   | 0(0)                                  | 6.7%  | 0.05 M BIH in MeCN-TEOA (5:1 v/v) mixed solution (4 mL), $\lambda=436$ nm (high-pressure Hg lamp), 12 h                                                                     | <i>J. Am. Chem. Soc.</i> <b>2016</b> , <i>138</i> , 4354-4357. <sup>[16]</sup>            |
|                                                         | Cu(3Bzth)                                                                                                         | 0.05 mM / 0.5 mM              | ~ 50(71)   | ~ 20(29) | 0(0)                                  | 4.1%  | 0.01 M BIH in MeCN-TEOA (5:1 v/v) mixed solution (4 mL), $\lambda=436$ nm by Xe lamp, 2 h (CO production is still continued.)                                               | <i>Front. Chem.</i> <b>2019</b> , <i>7</i> , 1-12. <sup>[17]</sup>                        |
| cyclopentadienone iron complex                          | [Ir(dF(CF <sub>3</sub> )ppy) <sub>2</sub> (dtbbpy)] <sup>+</sup>                                                  | 5 $\mu$ M / 1.67 mM           | 596(100)   | 0(0)     | 0(0)                                  | 34%   | NMP-TEOA (5:1 v/v) mixed solution (7.5 mL), Hg-lamp (400–700 nm), 5 h                                                                                                       | <i>Chem. Commun.</i> <b>2016</b> , <i>52</i> , 8393-8396. <sup>[18]</sup>                 |
| Cyclopentadienone iron complex                          | 5 $\mu$ mol [Cu(MeCN) <sub>4</sub> ]PF <sub>6</sub> , 15 $\mu$ mol xantphos P–P ligand and 5 $\mu$ mol N–N ligand | 0.13 mM / 0.67 mM             | 487(99)    | 7(1)     | 0(0)                                  | 13.3% | 0.1 M BIH in 7.5 mL NMP/TEOA (5:1,v/v), Hg-lamp (400–700 nm), 5 h                                                                                                           | <i>Green Chem.</i> <b>2017</b> , <i>19</i> , 2356-2360. <sup>[19]</sup>                   |
| Fe(CO) <sub>3</sub> bpy                                 | [Ru(bpy) <sub>3</sub> ] <sup>2+</sup>                                                                             | 0.25 $\mu$ mol / 25 $\mu$ mol | 173(51)    | 168(49)  | 0(0)                                  | 5.2%  | Fe(CO) <sub>3</sub> bpy 0.25 $\mu$ mol, [Ru(bpy) <sub>3</sub> ]Cl <sub>2</sub> (25 $\mu$ mol), ligand (1.25 ), 15 mL NMP/TEOA (5 : 1, v/v), visible light (400–700 nm), 5 h | <i>Catal. Sci. Technol.</i> <b>2016</b> , <i>6</i> , 3623-3630 <sup>[20]</sup>            |
| CoZn cryptate                                           | [Ru(phen) <sub>3</sub> ] <sup>2+</sup>                                                                            | 0.025 $\mu$ M / 0.4 mM        | 65000(98)  | 1280(2)  | 0(0)                                  | 0.15% | 0.3 M TEOA in H <sub>2</sub> O/MeCN (v/v, 1:4), LED light (450 nm), 10 h                                                                                                    | <i>Angew. Chem. Int. Ed. Engl.</i> <b>2018</b> , <i>57</i> , 16480-16485. <sup>[21]</sup> |
| CoCo cryptate                                           | [Ru(phen) <sub>3</sub> ] <sup>2+</sup>                                                                            | 0.025 $\mu$ M / 0.4 mM        | 17000(98)  | 368(2)   | 0(0)                                  | 0.04% |                                                                                                                                                                             |                                                                                           |
| [Co(qpy)(H <sub>2</sub> O) <sub>2</sub> ] <sup>2+</sup> | [Ru(bpy) <sub>3</sub> ] <sup>2+</sup>                                                                             | 0.05 mM / 0.3 mM              | 497(98)    | 3(1)     | 5(1)                                  | 2.8%  | 0.1 M BIH in MeCN/TEOA (4:1 v/v), blue LED (centered at 460 nm) for 3 h                                                                                                     | <i>J. Am. Chem. Soc.</i> <b>2016</b> , <i>138</i> , 9413-9416. <sup>[10]</sup>            |
|                                                         |                                                                                                                   | 0.005 mM / 0.3 mM             | 2660(98)   | 23(1)    | 35(1)                                 | -     |                                                                                                                                                                             |                                                                                           |
| [Ni( <sup>Pr</sup> bimiq1)] <sup>2+</sup>               | Ir(ppy) <sub>3</sub>                                                                                              | 2 nm / 0.2 mM                 | 98000(100) | 0(0)     | 0(0)                                  | 0.01% | 0.07 M TEA in MeCN, Xe lampequipped with an AM 1.5 filter, 7 h                                                                                                              | <i>J. Am. Chem. Soc.</i> <b>2013</b> , <i>135</i> , 14413-                                |

|                                                                           |                                                                                                                                                        |                             |                |          |      |       |                                                                                                                         |                                                                                    |
|---------------------------------------------------------------------------|--------------------------------------------------------------------------------------------------------------------------------------------------------|-----------------------------|----------------|----------|------|-------|-------------------------------------------------------------------------------------------------------------------------|------------------------------------------------------------------------------------|
|                                                                           |                                                                                                                                                        | 0.2 $\mu\text{M}$ / 0.2 mM  | 1500(100)      | 0(0)     | 0(0) | -     |                                                                                                                         | 14424. <sup>[22]</sup>                                                             |
| [Ni(bpet)(MeCN) <sub>2</sub> ] <sup>2+</sup>                              | [Ru(bpy) <sub>3</sub> ] <sup>2+</sup>                                                                                                                  | 0.03 mM / 0.5 mM            | 713(99)        | 7(1)     | 0(0) | 1.42% | 0.1 M BIH in DMA/H <sub>2</sub> O solution (4.0 mL, 9:1 v/v), 450 nm, 55 h                                              | <i>J. Am. Chem. Soc.</i> <b>2017</b> , <i>139</i> , 6538-6541. <sup>[23]</sup>     |
| [Ni(bpet-py <sub>2</sub> )(H <sub>2</sub> O) <sub>2</sub> ] <sup>2+</sup> | [Ru(bpy) <sub>3</sub> ] <sup>2+</sup>                                                                                                                  | 0.03 mM / 0.5 mM            | 120(99.7)      | 0.4(0.3) | 0(0) | 11.1% | 5.0 mM Mg(ClO <sub>4</sub> ) <sub>2</sub> and 0.1 M BIH in DMA/H <sub>2</sub> O solution (4.0 mL, 9:1 v/v), 450 nm, 4 h | <i>J. Am. Chem. Soc.</i> <b>2019</b> , <i>141</i> , 20309-20317. <sup>[24]</sup>   |
| [Cu(pyN <sub>2</sub> <sup>Me2</sup> )(HCO <sub>2</sub> )] <sup>-</sup>    | [Ru(phen) <sub>3</sub> ] <sup>2+</sup>                                                                                                                 | 0.05 $\mu\text{M}$ / 0.4 mM | 9900(98)       | 200(2)   | 0(0) | -     | TEOA (0.3 M) in MeCN/H <sub>2</sub> O (5 mL, v/v=4:1), LED light (450 nm), 10 h                                         | <i>Chem. Eur. J.</i> <b>2018</b> , <i>24</i> , 4503-4508. <sup>[25]</sup>          |
| [Cu(qpy)] <sup>2+</sup>                                                   | [Ru(bpy) <sub>3</sub> ] <sup>2+</sup>                                                                                                                  | 1 $\mu\text{M}$ / 2 mM      | 12400(97)      | 410(3)   | 0(0) | 1.2%  | TEOA (15% v/v) and H <sub>2</sub> O (3% v/v) in 2.5 mL MeCN, white LED lamp, 3 h.                                       | <i>ChemSusChem</i> <b>2017</b> , <i>10</i> , 4009-4013. <sup>[26]</sup>            |
| [Mn(pyrox)(CO) <sub>3</sub> Br]                                           | 5.0 $\mu\text{mol}$ [Cu(CH <sub>3</sub> CN) <sub>4</sub> ]PF <sub>6</sub> ,<br>5.0 $\mu\text{mol}$ bathocuproine,<br>and 15.0 $\mu\text{mol}$ xantphos | 1 $\mu\text{M}$ / 0.1 mM    | 1058(>99)      | 0(0)     | 0(0) | 0.47% | 0.1 M BIH in 10 mL MeCN/TEOA (5:1, v/v); Hg-lamp, 5 h.                                                                  | <i>ACS Catal.</i> <b>2019</b> , <i>9</i> , 2091-2100. <sup>[27]</sup>              |
| [Mn(4OMe)]                                                                | [Cu <sub>2</sub> (P <sub>2</sub> bph) <sub>2</sub> ] <sup>2+</sup>                                                                                     | 0.05 mM / 0.25 mM           | 1314(CO+HCOOH) |          |      | 57%   | 0.1 M BIH in 4 mL DMA-TEOA (4:1, v/v) solution, Hg lamp, 36 h                                                           | <i>J. Am. Chem. Soc.</i> , <b>2018</b> , <i>140</i> , 17241-17254. <sup>[28]</sup> |

## References

- [1] Z. Guo, G. Chen, C. Cometto, B. Ma, H. Zhao, T. Groizard, L. Chen, H. Fan, W.-L. Man, S.-M. Yiu, K.-C. Lau, T.-C. Lau, M. Robert, *Nature Catalysis* **2019**, *2*, 801-808.
- [2] L. Chen, Y. Qin, G. Chen, M. Li, L. Cai, Y. Qiu, H. Fan, M. Robert, T. C. Lau, *Dalton Trans.* **2019**, *48*, 9596-9602.
- [3] C.-F. Leung, S.-M. Ng, C.-C. Ko, W.-L. Man, J. Wu, L. Chen, T.-C. Lau, *Energy Environ. Sci.*, **2012**, *5*, 7903-7907.
- [4] R. Hogg, R. G. Wilkins, *J. Chem. Soc.* **1962**, 341-350.
- [5] F. Farzaneh, M. Poorkhosravani, M. Ghandi, *J. Mol. Catal. A: Chem.* **2009**, *308*, 108-113.
- [6] Z.-C. Fu, C. Mi, Y. Sun, Z. Yang, Q.-Q. Xu, W.-F. Fu, *Molecules* **2019**, *24*, 1878.
- [7] F. Kröhnke, *Synthesis* **1976**, 1-24.
- [8] I.-S. H. Lee, E. H. Jeoung, M. M. Kreevoy, *J. Am. Chem. Soc.* **1997**, *119*, 2722-2728.
- [9] E. L.-M. Wong, G.-S. Fang, C.-M. Che, N. Zhu, *Chem. Commun.* **2005**, 4578-4580.
- [10] Z. Guo, S. Cheng, C. Cometto, E. Anxolabéhère-Mallart, S.-M. Ng, C.-C. Ko, G. Liu, L. Chen, M. Robert, T.-C. Lau, *J. Am. Chem. Soc.* **2016**, *138*, 9413-9416.
- [11] C. Cometto, R. Kuriki, L. Chen, K. Maeda, T. C. Lau, O. Ishitani, M. Robert, *J. Am. Chem. Soc.* **2018**, *140*, 7437-7440.
- [12] J. Bonin, M. Robert, M. Routier, *J. Am. Chem. Soc.* **2014**, *136*, 16768-16771.
- [13] H. Rao, L. C. Schmidt, J. Bonin, M. Robert, *Nature* **2017**, *548*, 74-77.

- [14] H. Rao, J. Bonin, M. Robert, *ChemSusChem* **2017**, *10*, 4447-4450.
- [15] H. Rao, C. H. Lim, J. Bonin, G. M. Miyake, M. Robert, *J. Am. Chem. Soc.* **2018**, *140*, 17830-17834.
- [16] H. Takeda, K. Ohashi, A. Sekine, O. Ishitani, *J. Am. Chem. Soc.* **2016**, *138*, 4354-4357.
- [17] Y. Yamazaki, T. Onoda, J. Ishikawa, S. Furukawa, C. Tanaka, T. Utsugi, T. Tsubomura, *Front. Chem.* **2019**, *7*, 1-12.
- [18] A. Rosas-Hernandez, P. G. Alsabeh, E. Barsch, H. Junge, R. Ludwig, M. Beller, *Chem. Commun.* **2016**, *52*, 8393-8396.
- [19] A. Rosas-Hernandez, C. Steinlechner, H. Junge, M. Beller, *Green Chem.* **2017**, *19*, 2356-2360.
- [20] P. G. Alsabeh, A. Rosas-Hernandez, E. Barsch, H. Junge, R. Ludwig, M. Beller, *Catal. Sci. Technol.* **2016**, *6*, 3623-3630.
- [21] T. Ouyang, H. J. Wang, H. H. Huang, J. W. Wang, S. Guo, W. J. Liu, D. C. Zhong, T. B. Lu, *Angew. Chem. Int. Ed.* **2018**, *57*, 16480-16485.
- [22] V. S. Thoi, N. Kornienko, C. G. Margarit, P. Yang, C. J. Chang, *J. Am. Chem. Soc.* **2013**, *135*, 14413-14424.
- [23] D. Hong, Y. Tsukakoshi, H. Kotani, T. Ishizuka, T. Kojima, *J. Am. Chem. Soc.* **2017**, *139*, 6538-6541.
- [24] D. Hong, T. Kawanishi, Y. Tsukakoshi, H. Kotani, T. Ishizuka, T. Kojima, *J. Am. Chem. Soc.* **2019**, *141*, 20309-20317.
- [25] W.-J. Liu, H.-H. Huang, T. Ouyang, L. Jiang, D.-C. Zhong, W. Zhang, T.-B. Lu, *Chem. Eur. J.* **2018**, *24*, 4503-4508.
- [26] Z. Guo, F. Yu, Y. Yang, C.-F. Leung, S.-M. Ng, C.-C. Ko, C. Cometto, T.-C. Lau, M. Robert, *ChemSusChem* **2017**, *10*, 4009-4013.
- [27] C. Steinlechner, A. F. Roesel, E. Oberem, A. Pöpcke, N. Rockstroh, F. Gloaguen, S. Lochbrunner, R. Ludwig, A. Spannenberg, H. Junge, R. Francke, M. Beller, *ACS Catal.* **2019**, *9*, 2091-2100.
- [28] H. Takeda, H. Kamiyama, K. Okamoto, M. Irimajiri, T. Mizutani, K. Koike, A. Sekine, O. Ishitani, *J. Am. Chem. Soc.* **2018**, *140*, 17241-17254.
